# Supplementary material for: Spatiotemporal continuous estimates of daily 1 km PM 2.5 from 2000 to present under the Tracking Air Pollution in China (TAP) framework
Source: Copernicus journal article supplement (doi:10.5194/acp-22-13229-2022), 2022-10-14
Supplement: Supplementary file 1 [file acp-22-13229-2022-supplement.pdf]

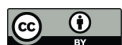

*Supplement of*

**Spatiotemporal continuous estimates of daily 1 km PM<sub>2.5</sub> from 2000 to present under the Tracking Air Pollution in China (TAP) framework**

**Qingyang Xiao et al.**

*Correspondence to:* Guannan Geng ([guannangeng@tsinghua.edu.cn](mailto:guannangeng@tsinghua.edu.cn))

The copyright of individual parts of the supplement might differ from the article licence.

**Table S1. The  $R^2$  of linear regressions between various reanalysis meteorological data products and measurements from local monitors.**

| Products  | Spatial resolution | Temperature at 2 m | Wind speed at 10 m |
|-----------|--------------------|--------------------|--------------------|
| ERA5-Land | 0.1 degree         | 0.94               | 0.30               |
| ERA5      | 0.25 degree        | 0.82               | 0.01               |
| MERRA-2   | 0.5×0.625 degree   | 0.95               | 0.26               |

**Table S2 The types of roads used in this study**

| This study     | OpenStreetMap                    | Survey road map                   |
|----------------|----------------------------------|-----------------------------------|
| High way       | Motors                           | High way                          |
| Primary road   | Trunk and primary road           | National road and provincial road |
| Secondary road | Secondary road and tertiary road | County road                       |

**Table S3. Correlation coefficients of comparisons between various road length data**

|                                              | Year | Highway | Primary road | Secondary road |
|----------------------------------------------|------|---------|--------------|----------------|
| OpenStreetMap and survey map                 | 2014 | 0.88    | 0.74         | 0.35           |
| OpenStreetMap and estimated<br>OpenStreetMap | 2015 | 0.92    | 0.84         | 0.56           |
| Survey map and estimated OpenStreetMap       | 2000 | 0.44    |              |                |
|                                              | 2004 | 0.83    | 0.75         | 0.31           |
|                                              | 2005 | 0.93    | 0.82         | 0.54           |
|                                              | 2010 | 0.91    | 0.83         | 0.56           |
|                                              | 2012 | 0.93    | 0.83         | 0.51           |
|                                              | 2015 | 0.91    | 0.82         | 0.57           |

**Table S4. Validation of the sum road length prediction model at the city level**

|                                           | Road type | Correlation coefficient |
|-------------------------------------------|-----------|-------------------------|
| By-year cross validation<br>(2013-2019)   | High way  | 0.68                    |
|                                           | Primary   | 0.67                    |
|                                           | Secondary | 0.73                    |
| Four-year cross validation<br>(2013-2015) | High way  | 0.64                    |
|                                           | Primary   | 0.64                    |
|                                           | Secondary | 0.76                    |

**Table S5. Performance of the 2019 model with various meteorological predictors**

| $R^2$ (RMSE)                                                                           | Out-of-bag | Test data |
|----------------------------------------------------------------------------------------|------------|-----------|
| Full model                                                                             | 0.85       | 0.85      |
| Remove precipitation                                                                   | 0.84       | 0.85      |
| Remove precipitation, wind fields                                                      | 0.83       | 0.84      |
| Remove precipitation, wind fields, surface pressure                                    | 0.82       | 0.83      |
| Remove precipitation, wind fields, surface pressure, relative humidity                 | 0.81       | 0.83      |
| Remove precipitation, wind fields, surface pressure, relative humidity and temperature | 0.80       | 0.83      |

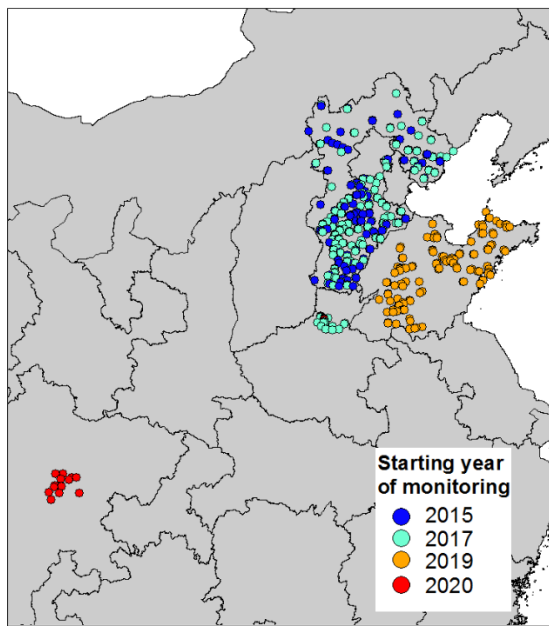

**Figure S1. Location of local monitors with the year that monitoring started**

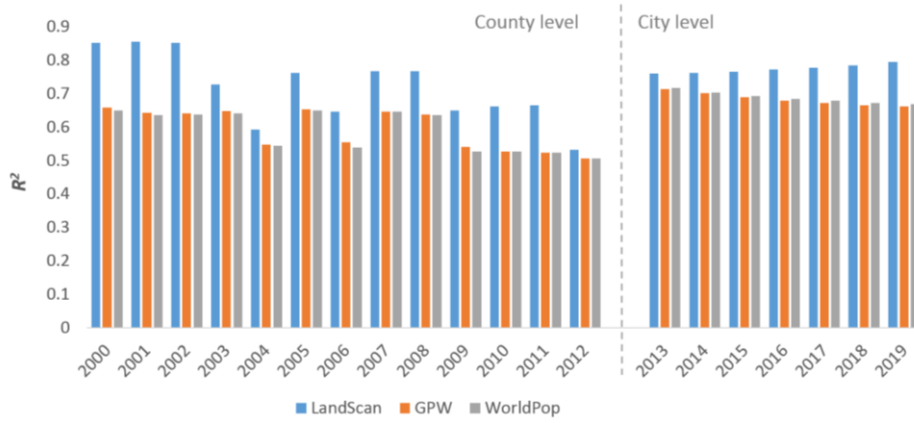

**Figure S2. Population distribution dataset performance compared to the yearbook records at the county level (before 2013) and the city level (after 2013).**



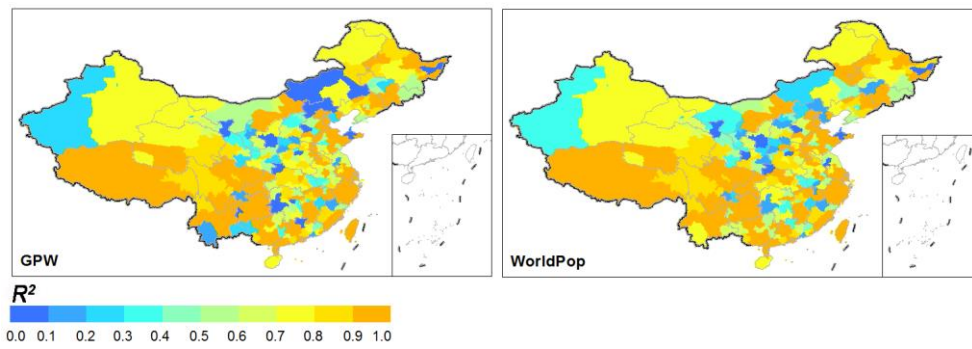

**Figure S3. The spatial distribution of the coefficient of determination of the GPW and WorldPop gridded population products.**

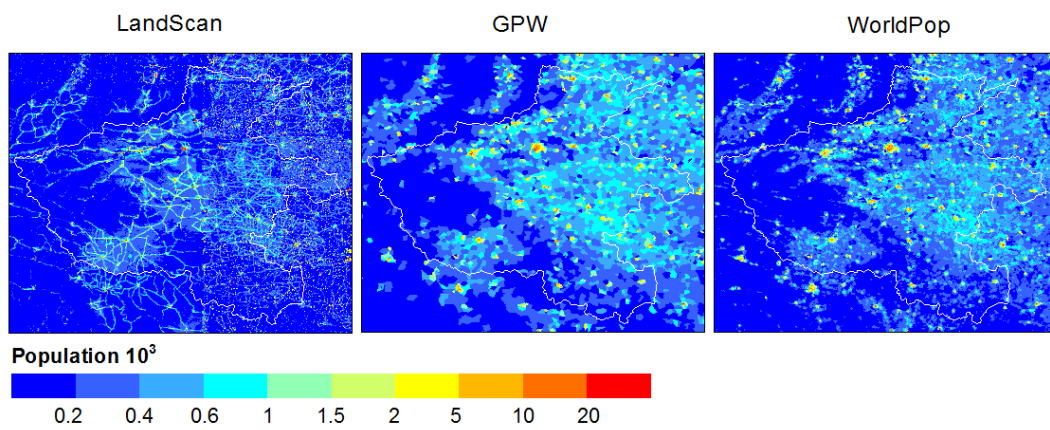

**Supplementary Figure 4. The spatial distribution of population of LanScan, GPW, and WorldPop over Henan province in 2000.**

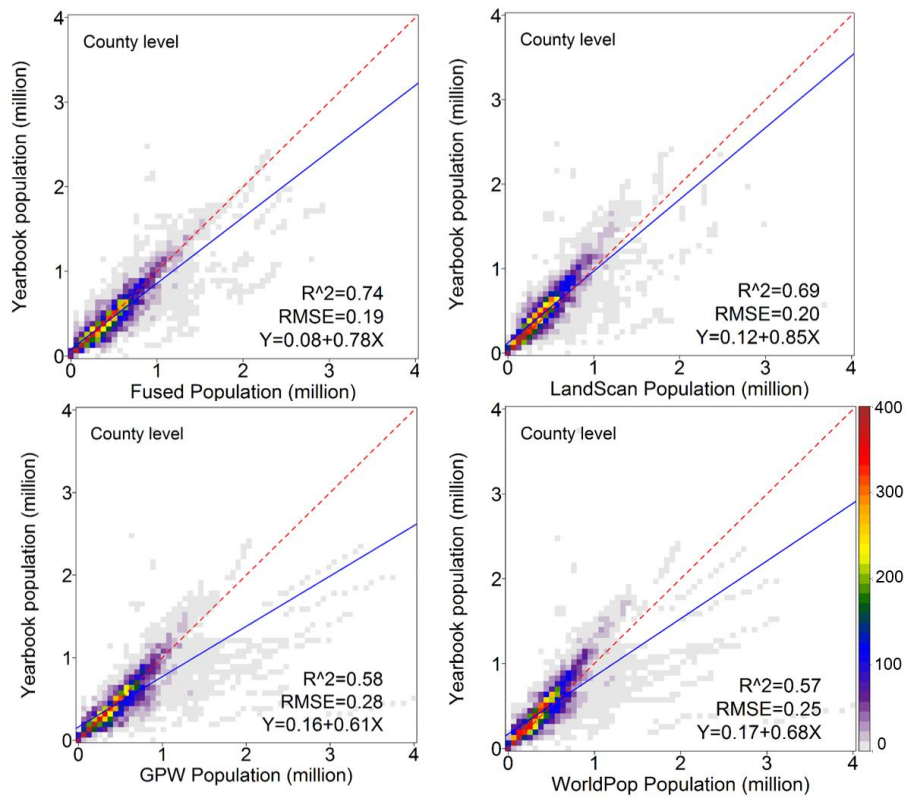

**Supplementary Figure 5. The population distribution dataset performance compared to the yearbook records at the county level (before 2013) and the city level (after 2013).**
